# Supplementary material for: Determinants of Hospital Length of Stay in Children Under 59 Months with Acute Severe Malnutrition: Insights from Eastern Democratic Republic of Congo
Source: Research Square preprint supplement (doi:10.21203/rs.3.rs-7132774/v1), 2025-09-01
Supplement: Supplementary file 1 [file 663c7f9eca84c43e0bc9886a.docx]

Questionnaire

1. Sociodemographic characteristics:
   1. children's information (age, sex);
   2. Information on parents/guardians: person in charge, marital status of parents/guardians (married, free union, divorced), profession (employed vs unemployed), household size.
2. Clinical characteristics:
   1. ASM type (marasmus, kwashiorkor, marasmus-kwashiorkor);
   2. Anthropometric measures: brachial perimeter (mid-upper arm circumference), weight, height (at admission and discharge), ponderal gain (calculated as the difference between weight at discharge and weight at admission).
   3. Clinical signs: presence of edemas, appetite, hypothermia, hypoglycemia;
   4. Medical history: history of ASM, vaccination calendar (updated or not), age of introduction of complementary feeding; Birth weight (obtained from health records or parental recall).
   5. Associated comorbidities: malaria (confirmed by a rapid test or microscopically), infections, sepsis, diarrheas, tuberculosis (suspected or confirmed) …
3. Medication modalities:
   1. Type of therapeutic food used: F-75, F-100, F-100D, RUTF **(=** Ready-to-Use Therapeutic Food).
   2. Medical treatment: antibiotics, antiparasitic, antimalarial, vitamin A, ReSoMal.
4. Date of discharge: Date children met the criteria to exit the program.
